# Supplementary material
Source: PubMed Central journal article supplement (PMC7904667)
Supplement: NIHMS1662868-supplement-Supplemental_Publication_Material.pdf [file NIHMS1662868-supplement-Supplemental_Publication_Material.pdf]

# SUPPLEMENTAL MATERIALS

## Inhibition of T-cells by cyclosporine A reduces macrophage accumulation to regulate venous adaptive remodeling and increase arteriovenous maturation

Yutaka Matsubara<sup>1,2</sup>, Gathe Kiwan<sup>1</sup>, Jia Liu<sup>1</sup>, Luis Gonzalez<sup>1</sup>, John Langford<sup>1</sup>, Mingjie Gao<sup>1</sup>, Xixiang Gao<sup>1</sup>, Ryosuke Taniguchi<sup>1,3</sup>, Bogdan Yatsula<sup>1</sup>, Tadashi Furuyama<sup>2</sup>, Takuya Matsumoto<sup>4</sup>, Kimihiro Komori<sup>5</sup> and \*Alan Dardik<sup>1,6,7</sup>

1. Vascular Biology and Therapeutics Program, Yale School of Medicine, New Haven, CT
2. Department of Surgery and Sciences, Kyushu University, Fukuoka, Japan
3. Division of Vascular Surgery, The University of Tokyo, Tokyo, Japan
4. Department of Vascular Surgery, Kyushu Central Hospital, Fukuoka, Japan
5. Division of Vascular Surgery, Department of Surgery, Nagoya University Graduate School of Medicine, Nagoya, Japan
6. Division of Vascular and Endovascular Surgery, Department of Surgery, Yale School of Medicine, New Haven, CT
7. Department of Surgery, VA Connecticut Healthcare Systems, West Haven, CT

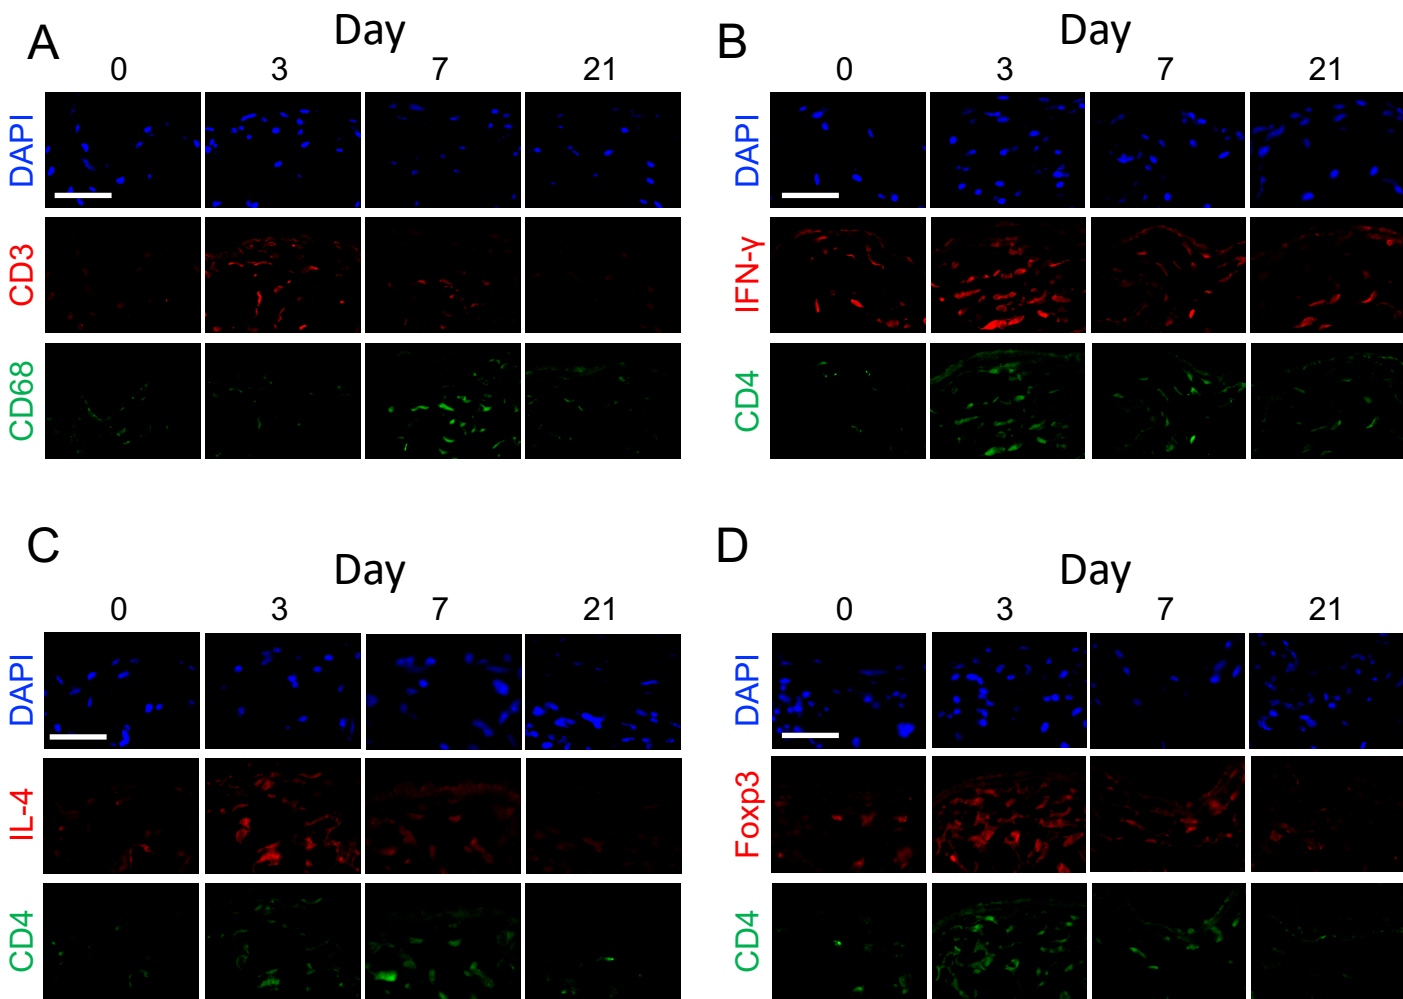

**Supplemental Figure I. Individual channels of immunofluorescence shown in Figure 2. (A)** Representative photomicrographs showing CD3 (red) and CD68 (green). **(B)** Representative photomicrographs showing CD4 (green) and IFN- $\gamma$  (red). **(C)** Representative photomicrographs showing CD4 (green) and IL-4 (red). **(D)** Representative photomicrographs showing CD4 (green) and Foxp3 (red). Wild type mouse AVF wall at days 0, 3, 7 or 21. Scale bar, 50  $\mu$ m.

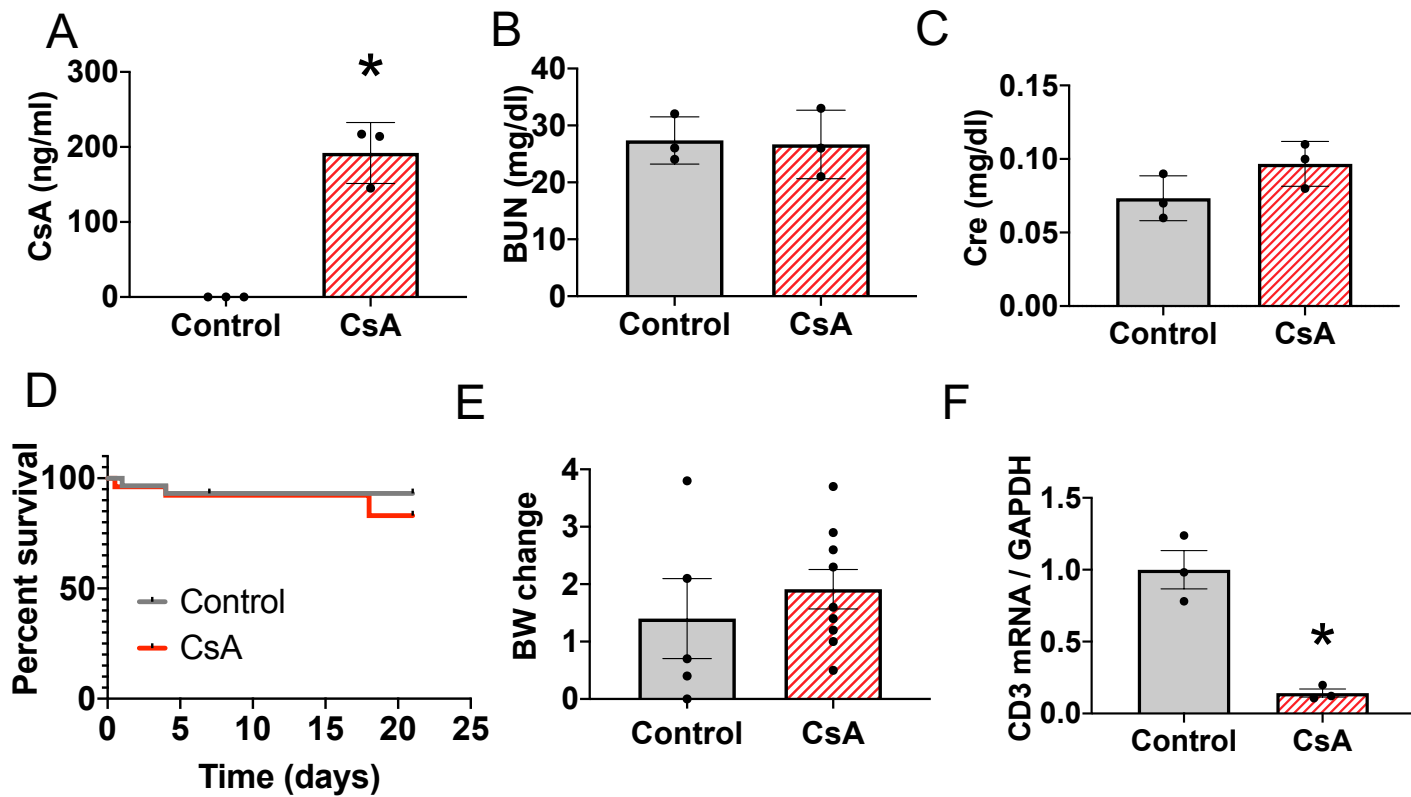

**Supplemental Figure II. Lack of cyclosporine toxicity in vivo.** (A) Bar graph shows serum CsA concentration in C57BL6/J mice treated with vehicle (control) or CsA. n=3. \*P=0.021 (t-test), P=0.1000 (Mann-Whitney U test). (B) Bar graph shows blood urea nitrogen (BUN) level in C57BL6/J mice treated with vehicle (control) or CsA. n=3. P=0.8824 (t-test), P=0.9999 (Mann-Whitney U test). (C) Bar graph shows blood creatine (Cre) level in C57BL6/J mice treated with vehicle (control) or CsA. n=3. P=0.1347 (t-test), P=0.2000 (Mann-Whitney U test). (D) Survival curves after AVF creation in C57BL6/J mice treated with vehicle (control) or CsA. n=26-29. P=0.6795 (log-rank test). (E) Bar graph shows body weight changes (day 21) in C57BL6/J mice treated with vehicle (control) or CsA. n=5-9. P=0.4710 (t-test). (F) Bar graph shows relative number of CD3 mRNA transcripts (day 7) in the spleen of C57BL6/J mice treated with vehicle (control) or CsA. n=3, \*P=0.0032 (t-test), P=0.1000 (Mann-Whitney U test).

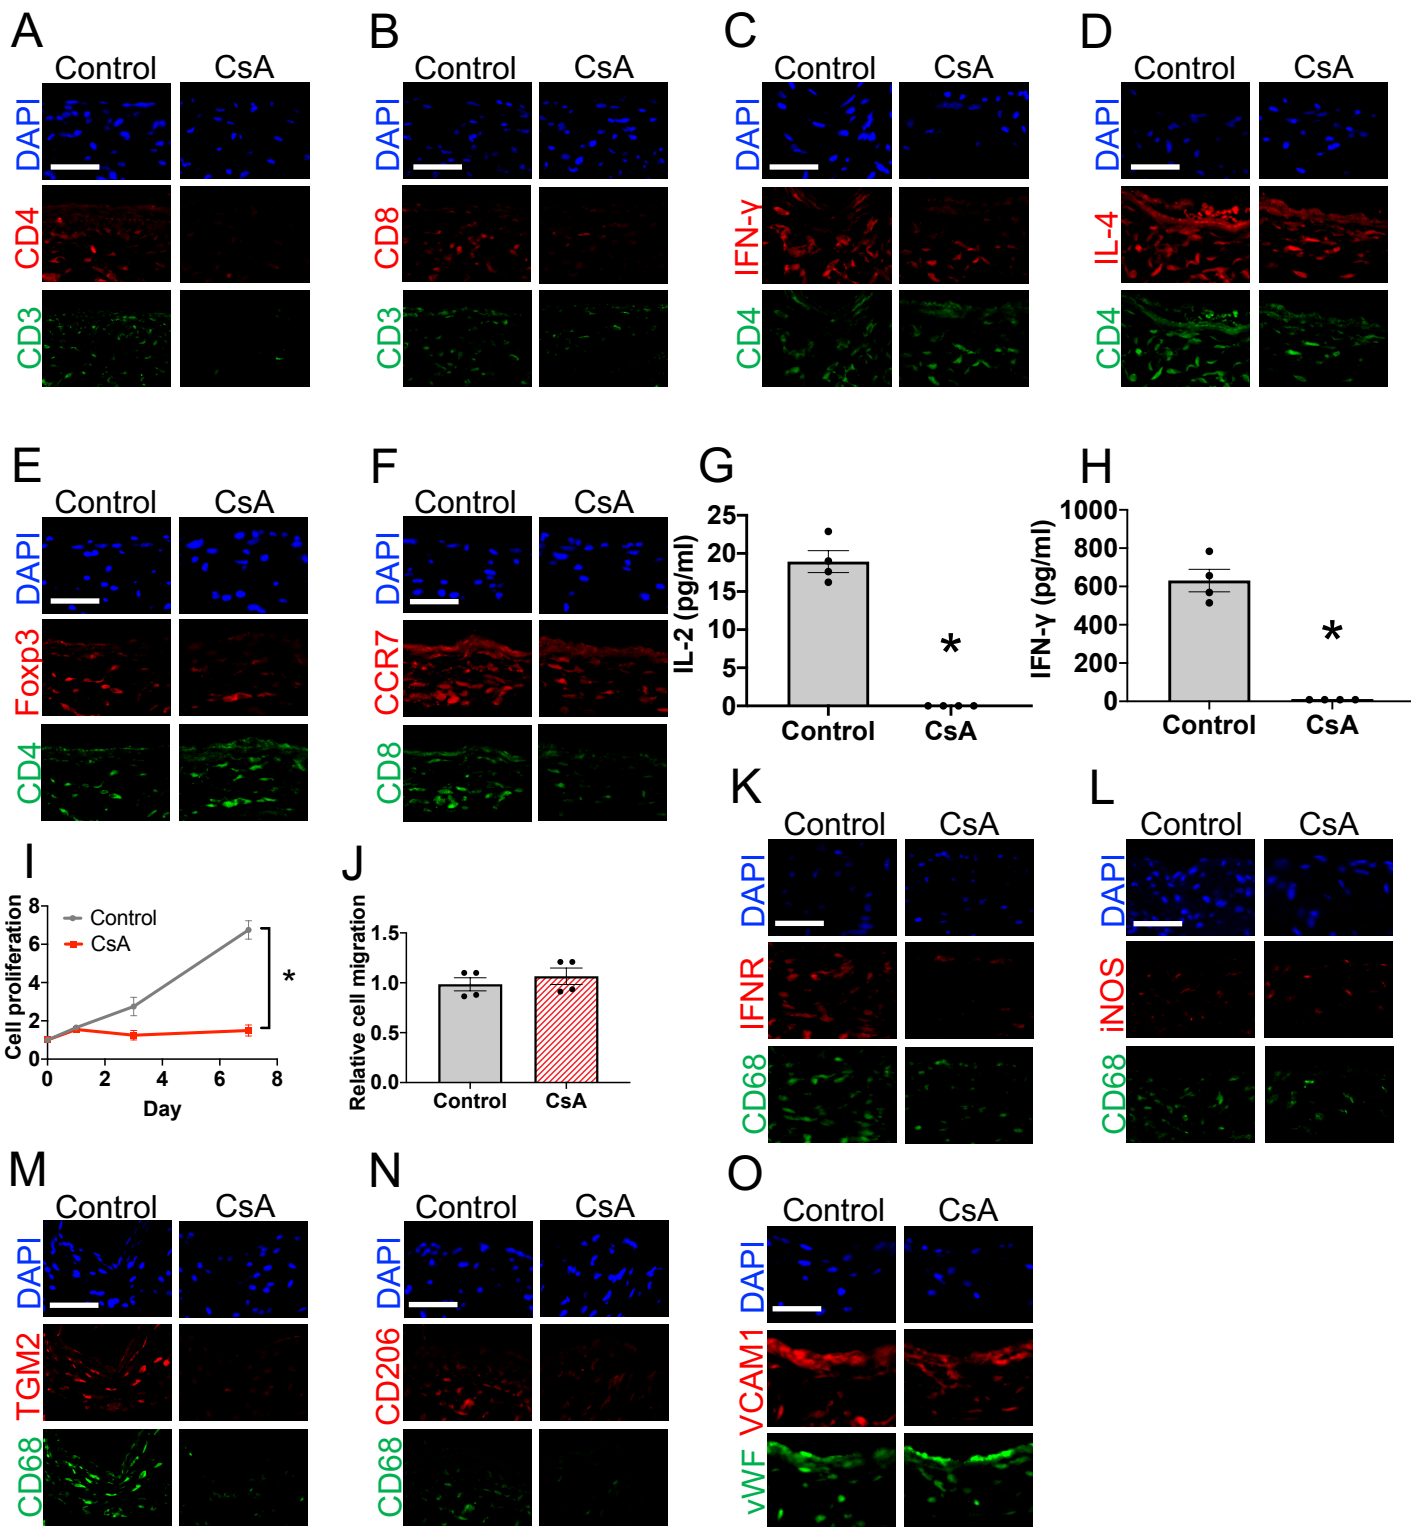

**Supplemental Figure III. CsA is associated with reduced T-cells and macrophages during venous remodeling. (A)** Representative photomicrographs showing CD3 (green) and CD4 (red). Scale bar, 50  $\mu$ m. **(B)** Representative photomicrographs showing CD3 (green) and CD8 (red). **(C)** Representative photomicrographs showing CD4 (green) and IFN- $\gamma$  (red). **(D)** Representative photomicrographs showing CD4 (green) and IL-4 (red). **(E)** Representative photomicrographs showing CD4 (green) and Foxp3 (red). **(F)** Representative photomicrographs showing CD8 (green) and CCR7 (red). **(G)** Bar graph shows IL-2 concentration in cell culture supernatants of mouse lymphocytes treated with vehicle (control) or CsA.  $n=4$ . \* $P<0.0001$  (t-test),  $P=0.0286$  (Mann-Whitney U test). **(H)** Bar graph shows IFN- $\gamma$  concentration in cell culture supernatants of mouse lymphocytes treated with vehicle (control) or CsA.  $n=4$ . \* $P<0.0001$  (t-test),  $P=0.0286$  (Mann-Whitney U test). **(I)** Line graph shows relative cell numbers of mouse lymphocytes treated with vehicle (control) or CsA.  $n=4$ .  $P=0.0002$  (ANOVA). The values are normalized to day 0. Day 1,  $P=0.8624$  (post hoc). Day 3,  $P=0.0542$  (post hoc). Day 7, \* $P=0.0009$  (post hoc). **(J)** Bar graph shows relative numbers of migrating mouse lymphocytes treated with vehicle (control) or CsA. The values are normalized to the control group.  $n=4$ .  $P=0.2366$  (t-test),  $P=0.1429$  (Mann-Whitney U test). **(K)** Representative photomicrographs showing CD68 (green) and IFN- $\gamma$  (red). **(L)** Representative photomicrographs showing CD68 (green) and iNOS (red). **(M)** Representative photomicrographs showing CD68 (green) and TGM2 (red). **(N)** Representative photomicrographs showing CD68 (green) and CD206 (red). **(O)** Representative photomicrographs showing vWF (green) and VCAM1 (red). Wild type mouse AVF wall at day 7 treated with vehicle (control) or cyclosporine (CsA). Scale bar, 50  $\mu$ m.



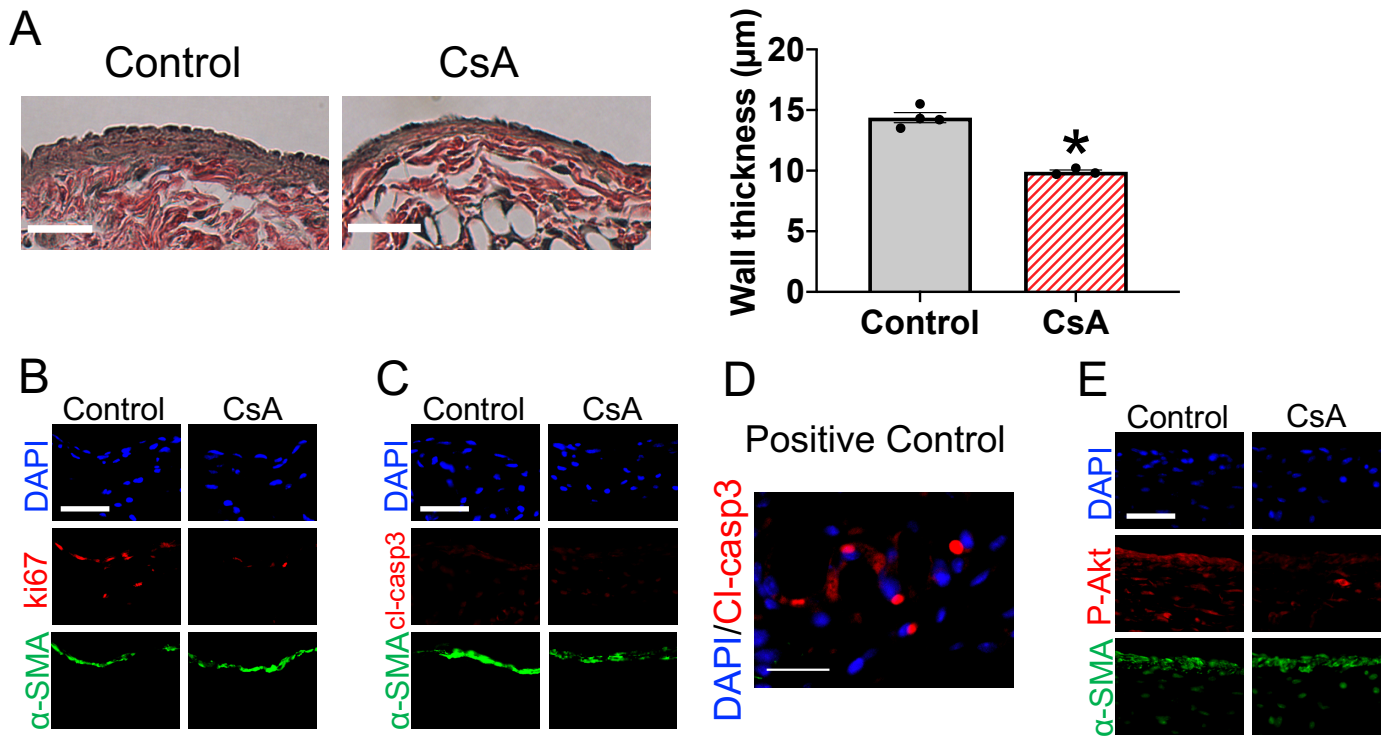

**Supplemental Figure IV. CsA reduces AVF wall thickening and SMC proliferation in wild type female mice.** (A) Representative photomicrographs of the wild type female mouse AVF wall treated with vehicle (control) or Cyclosporine (CsA), stained with Elastin van Gieson (EVG); day 21. Scale bar, 25 μm. Bar graph shows intima-media thickness of the AVF wall in mice treated with control or CsA. n=3-4. \*P=0.0571 (Mann-Whitney U test). (B) Representative photomicrographs showing α-SMA (green) and ki67 (red) (C) Representative photomicrographs showing α-SMA (green) and cleaved caspase (Cl-casp) 3 (red) (D) Representative photomicrographs showing positive control of Cl-casp3 (red) (E) Representative photomicrographs showing α-SMA (green) and P-Akt (red). Wild type mouse AVF wall at day 7 treated with vehicle (control) or cyclosporine (CsA). Scale bar, 50 μm.

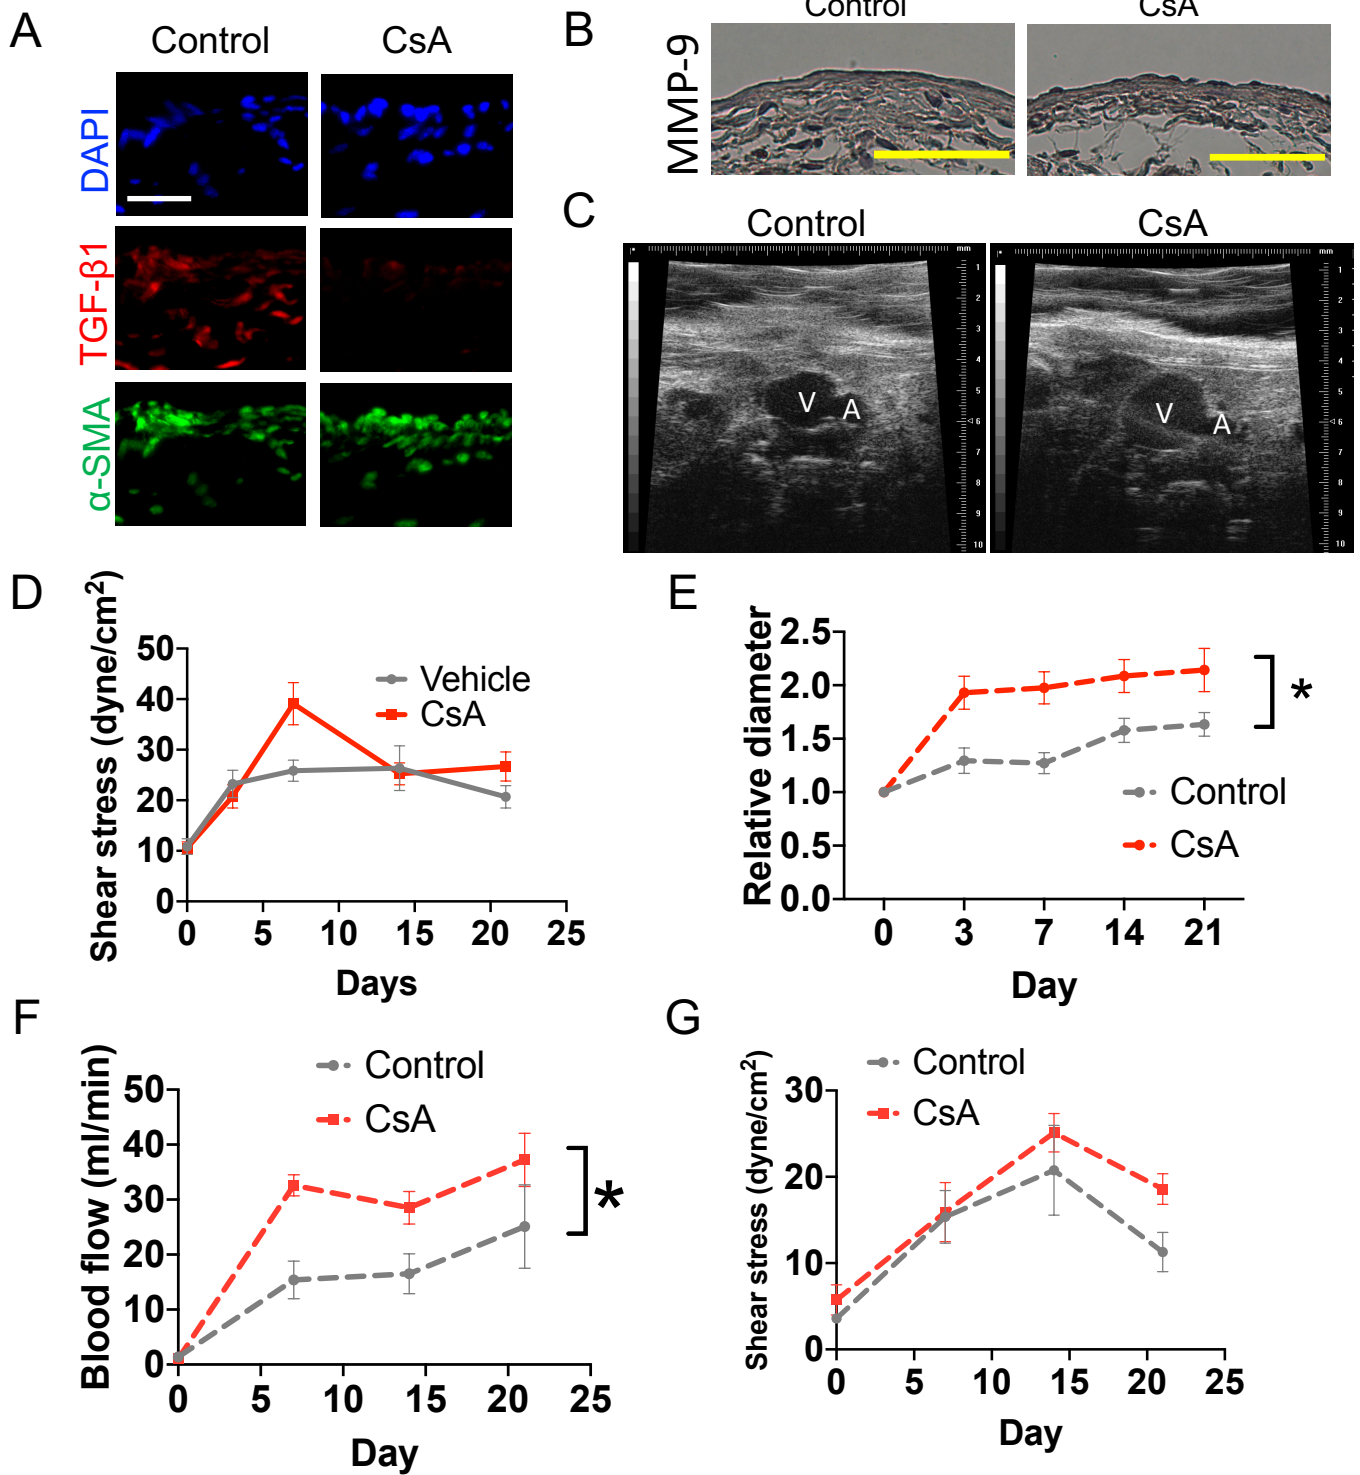

**Supplemental Figure V. CsA reduces TGF- $\beta$  expression and collagen density to promote AVF outward remodeling.** (A) Representative photomicrographs showing individual channels of Figure 5G.  $\alpha$ -SMA (green) and TGF- $\beta$ 1 (red). Wild type mouse AVF wall at day 7 treated with vehicle (control) or cyclosporine (CsA). Scale bar, 50  $\mu$ m. (B) Representative photomicrographs showing immunohistochemistry of MMP-9 in the AVF of wild type male mice treated with control or CsA. Scale bar, 50  $\mu$ m. (C) Representative ultrasound images showing IVC (V) and Aorta (A) treated with control or CsA. (D) Line graph shows wall shear stress in AVF of wild type male mice treated with control or CsA.  $P = 0.1541$  (ANOVA).  $n = 5-20$ . (E) Line graph shows relative AVF diameter of wild type female mice treated with control or CsA, normalized to day 0.  $n = 3-10$ .  $*P = 0.0172$  (ANOVA). (F) Line graph shows blood flow of wild type female mouse AVF treated with control or CsA.  $n = 3-10$ .  $*P = 0.0412$  (ANOVA). (G) Line graph shows wall shear stress in AVF of wild type female mice treated with control or CsA.  $P = 0.1541$  (ANOVA).  $n = 5-20$ .

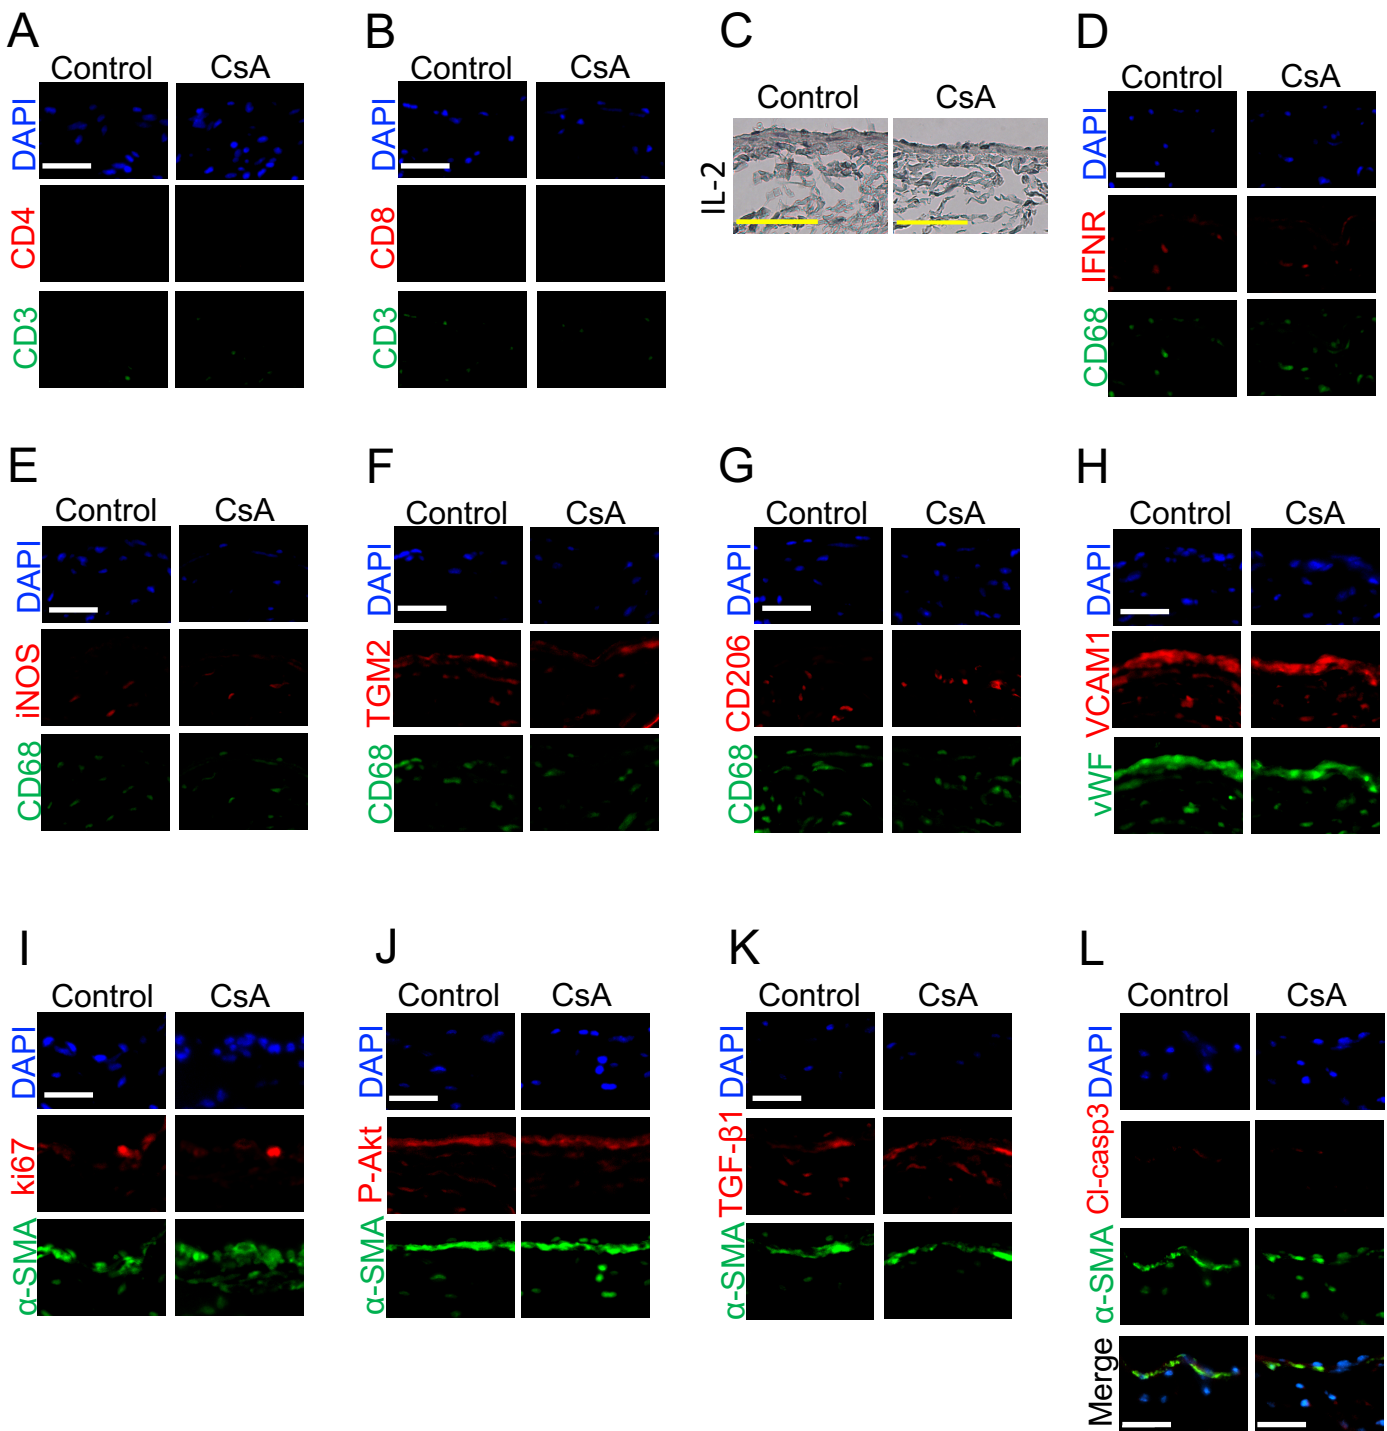

**Supplemental Figure VI. Individual channels of immunofluorescence and immunohistochemistry of IL-2 in AVF in nude mice.** (A) Representative photomicrographs showing CD3 (green) and CD4 (red) (B) Representative photomicrographs showing CD3 (green) and CD8 (red) (C) Representative photomicrographs showing immunohistochemistry of IL-2 in nude mouse AVF at day 7. Scale bar, 50  $\mu$ m. (D) Representative photomicrographs showing CD68 (green) and IFNR (red). (E) Representative photomicrographs showing CD68 (green) and iNOS (red). (F) Representative photomicrographs showing CD68 (green) and TGM2 (red). (G) Representative photomicrographs showing CD68 (green) and CD206 (red). (H) Representative photomicrographs showing vWF (green) and VCAM1 (red). (I) Representative photomicrographs showing  $\alpha$ -SMA (green) and ki67 (red). (J) Representative photomicrographs showing  $\alpha$ -SMA (green) and P-Akt (red). (K) Representative photomicrographs showing  $\alpha$ -SMA (green) and TGF- $\beta$ 1 (red). (L) Representative photomicrographs showing  $\alpha$ -SMA (green) and cleaved caspase (Cl-casp) 3 (red). Nude mouse AVF wall at day 7 treated with vehicle (control) or cyclosporine (CsA). Scale bar, 50  $\mu$ m.

## Major Resources Table

In order to allow validation and replication of experiments, all essential research materials listed in the Methods should be included in the Major Resources Table below. Authors are encouraged to use public repositories for protocols, data, code, and other materials and provide persistent identifiers and/or links to repositories when available. Authors may add or delete rows as needed.

### Animals (in vivo studies)

| Species | Vendor or Source       | Background Strain | Sex    | Persistent ID / URL |
|---------|------------------------|-------------------|--------|---------------------|
| Mice    | The Jackson Laboratory | C57BL6/J          | Male   | 000664              |
| Mice    | The Jackson Laboratory | C57BL6/J          | Female | 000664              |
| Mice    | The Jackson Laboratory | NU/J              | Male   | 002019              |

### Antibodies

| Target antigen    | Vendor or Source          | Catalog # | Working concentration            | Persistent ID / URL                                                                                                                                                                                                                                                                                                           |
|-------------------|---------------------------|-----------|----------------------------------|-------------------------------------------------------------------------------------------------------------------------------------------------------------------------------------------------------------------------------------------------------------------------------------------------------------------------------|
| vWF               | Abcam                     | ab11713   | 5µg/ml                           | <a href="https://www.abcam.com/von-willebrand-factor-antibody-ab11713.html">https://www.abcam.com/von-willebrand-factor-antibody-ab11713.html</a>                                                                                                                                                                             |
| IFN-γ             | R&D systems               | AF485     | 5µg/ml                           | <a href="https://www.rndsystems.com/products/mouse-ifn-gamma-antibody_af-485-na">https://www.rndsystems.com/products/mouse-ifn-gamma-antibody_af-485-na</a>                                                                                                                                                                   |
| IL-4              | R&D systems               | AF404     | 5µg/ml                           | <a href="https://www.rndsystems.com/products/mouse-il-4-antibody_af-404-na">https://www.rndsystems.com/products/mouse-il-4-antibody_af-404-na</a>                                                                                                                                                                             |
| IFNγ-R            | Abcam                     | ab77246   | 10µg/ml                          | <a href="https://www.abcam.com/tnf-alpha-antibody-ab6671.html">https://www.abcam.com/tnf-alpha-antibody-ab6671.html</a>                                                                                                                                                                                                       |
| iNOS              | Abcam                     | ab15323   | 10µg/ml                          | <a href="https://www.abcam.com/inos-antibody-ab15323.html">https://www.abcam.com/inos-antibody-ab15323.html</a>                                                                                                                                                                                                               |
| TGM2              | Cell signaling technology | 3557      | 10µg/ml                          | <a href="https://www.cellsignal.co.uk/products/primary-antibodies/tgm2-d11a6-xp-rabbit-mab/3557?N=4294967254+4294956287&amp;Nrpp=200&amp;No=600&amp;fromPage=plp">https://www.cellsignal.co.uk/products/primary-antibodies/tgm2-d11a6-xp-rabbit-mab/3557?N=4294967254+4294956287&amp;Nrpp=200&amp;No=600&amp;fromPage=plp</a> |
| CD206             | Abcam                     | ab64693   | 5µg/ml                           | <a href="https://www.abcam.com/mannose-receptor-antibody-ab64693.html">https://www.abcam.com/mannose-receptor-antibody-ab64693.html</a>                                                                                                                                                                                       |
| CD3               | R&D systems               | MAB4841   | 25µg/ml (IF, IHC)<br>1µg/ml (WB) | <a href="https://www.rndsystems.com/products/mouse-cd3-antibody-17a2_mab4841">https://www.rndsystems.com/products/mouse-cd3-antibody-17a2_mab4841</a>                                                                                                                                                                         |
| CD4               | Abcam                     | ab183685  | 10µg/ml                          | <a href="https://www.abcam.com/cd4-antibody-epr19514-ab183685.html">https://www.abcam.com/cd4-antibody-epr19514-ab183685.html</a>                                                                                                                                                                                             |
| CD8               | Abcam                     | ab203035  | 10µg/ml                          | <a href="https://www.abcam.com/cd8-antibody-ab203035.html">https://www.abcam.com/cd8-antibody-ab203035.html</a>                                                                                                                                                                                                               |
| CD68              | Bio-Rad                   | MCA1957   | 10µg/ml (IF, IHC)<br>1µg/ml (WB) | <a href="https://www.bio-rad-antibodies.com/monoclonal/mouse-cd68-antibody-fa-11-mca1957.html?f=purified">https://www.bio-rad-antibodies.com/monoclonal/mouse-cd68-antibody-fa-11-mca1957.html?f=purified</a>                                                                                                                 |
| α-SMA             | Abcam                     | ab7817    | 5µg/ml                           | <a href="https://www.abcam.com/alpha-smooth-muscle-actin-antibody-1a4-ab7817.html">https://www.abcam.com/alpha-smooth-muscle-actin-antibody-1a4-ab7817.html</a>                                                                                                                                                               |
| ki67              | Abcam                     | ab15580   | 5µg/ml                           | <a href="https://www.abcam.com/ki67-antibody-ab15580.html">https://www.abcam.com/ki67-antibody-ab15580.html</a>                                                                                                                                                                                                               |
| IL-2              | Abcam                     | ab180780  | 10 µg/ml                         | <a href="https://www.abcam.com/il-2-antibody-ab180780.html">https://www.abcam.com/il-2-antibody-ab180780.html</a>                                                                                                                                                                                                             |
| TGF-β1            | Abcam                     | ab92486   | 10 µg/ml                         | <a href="https://www.abcam.com/tgf-beta-1-antibody-ab92486.html">https://www.abcam.com/tgf-beta-1-antibody-ab92486.html</a>                                                                                                                                                                                                   |
| MCP-1             | Abcam                     | ab25124   | 10 µg/ml                         | <a href="https://www.abcam.com/mcp1-antibody-ab25124.html">https://www.abcam.com/mcp1-antibody-ab25124.html</a>                                                                                                                                                                                                               |
| LIX-1             | Abcam                     | ab235524  | 10 µg/ml                         | <a href="https://www.abcam.com/lix1-antibody-ab235524.html">https://www.abcam.com/lix1-antibody-ab235524.html</a>                                                                                                                                                                                                             |
| collagen I        | Abcam                     | ab34710   | 10 µg/ml                         | <a href="https://www.abcam.com/collagen-i-antibody-ab34710.html">https://www.abcam.com/collagen-i-antibody-ab34710.html</a>                                                                                                                                                                                                   |
| collagen III      | Abcam                     | ab7778    | 10 µg/ml                         | <a href="https://www.abcam.com/collagen-iii-antibody-ab7778.html">https://www.abcam.com/collagen-iii-antibody-ab7778.html</a>                                                                                                                                                                                                 |
| Foxp 3            | Abcam                     | ab212700  | 5µg/ml                           | <a href="https://www.abcam.com/foxp3-antibody-3g3-bsa-and-azide-free-ab212700.html">https://www.abcam.com/foxp3-antibody-3g3-bsa-and-azide-free-ab212700.html</a>                                                                                                                                                             |
| cleaved-caspase 3 | Cell signaling technology | 9664      | 0.2µg/ml                         | <a href="https://www.cellsignal.com/products/primary-antibodies/cleaved-caspase-3-asp175-5a1e-rabbit-mab/9664?country=USA">https://www.cellsignal.com/products/primary-antibodies/cleaved-caspase-3-asp175-5a1e-rabbit-mab/9664?country=USA</a>                                                                               |
| CCR7              | Novus Biologicals         | NB100-712 | 10 µg/ml                         | <a href="https://www.novusbio.com/products/ccr7-antibody_nb100-712">https://www.novusbio.com/products/ccr7-antibody_nb100-712</a>                                                                                                                                                                                             |
| VCAM-1            | Abcam                     | ab106777  | 10 µg/ml                         | <a href="https://www.abcam.com/vcam1-antibody-ab106777.html">https://www.abcam.com/vcam1-antibody-ab106777.html</a>                                                                                                                                                                                                           |

DOI [to be added]

|                                |                           |          |                                |                                                                                                                                                                                                                                                                                                                                                                           |
|--------------------------------|---------------------------|----------|--------------------------------|---------------------------------------------------------------------------------------------------------------------------------------------------------------------------------------------------------------------------------------------------------------------------------------------------------------------------------------------------------------------------|
| Akt-1                          | Cell signaling technology | 2967     | 0.5 µg/ml                      | <a href="https://www.cellsignal.com/products/primary-antibodies/akt1-2h10-mouse-mab/2967">https://www.cellsignal.com/products/primary-antibodies/akt1-2h10-mouse-mab/2967</a>                                                                                                                                                                                             |
| Phospho-Akt                    | Cell signaling technology | 9018     | 10 µg/m (IF)<br>0.5 µg/ml (WB) | <a href="https://www.cellsignal.com/products/primary-antibodies/phospho-akt1-ser473-d7f10-xp-rabbit-mab-akt1-specific/9018">https://www.cellsignal.com/products/primary-antibodies/phospho-akt1-ser473-d7f10-xp-rabbit-mab-akt1-specific/9018</a>                                                                                                                         |
| GAPDH                          | Cell signaling technology | 2118     | 0.01µg/ml                      | <a href="https://www.cellsignal.com/products/primary-antibodies/gapdh-14c10-rabbit-mab/2118?country=USA">https://www.cellsignal.com/products/primary-antibodies/gapdh-14c10-rabbit-mab/2118?country=USA</a>                                                                                                                                                               |
| Anti-sheep Alexa-Fluor-488     | Invitrogen                | A-11015  | 5µg/ml                         | <a href="https://www.thermofisher.com/antibody/product/Donkey-anti-Sheep-IgG-H-L-Cross-Adsorbed-Secondary-Antibody-Polyclonal/A-11015">https://www.thermofisher.com/antibody/product/Donkey-anti-Sheep-IgG-H-L-Cross-Adsorbed-Secondary-Antibody-Polyclonal/A-11015</a>                                                                                                   |
| Rabbit IgG control             | Santa-Cruz                | sc-3888  | Same as primary Antibodies     | <a href="https://datasheets.scbt.com/sc-3888.pdf">https://datasheets.scbt.com/sc-3888.pdf</a>                                                                                                                                                                                                                                                                             |
| Mouse IgG control              | Santa-Cruz                | sc-2025  | Same as primary Antibodies     | <a href="https://datasheets.scbt.com/sc-2025.pdf">https://datasheets.scbt.com/sc-2025.pdf</a>                                                                                                                                                                                                                                                                             |
| Rat IgG control                | BD Bioscience             | 559478   | Same as primary Antibodies     | <a href="https://www.bdbiosciences.com/us/applications/research/b-cell-research/immunoassays/elisa/pairs-and-standards/other-species/purified-rat-igg2b-isotype-control-a95-1/p/559478">https://www.bdbiosciences.com/us/applications/research/b-cell-research/immunoassays/elisa/pairs-and-standards/other-species/purified-rat-igg2b-isotype-control-a95-1/p/559478</a> |
| Goat IgG control               | R&D systems               | AB-108-C | Same as primary Antibodies     | <a href="https://www.rndsystems.com/products/normal-goat-igg-control_ab-108-c">https://www.rndsystems.com/products/normal-goat-igg-control_ab-108-c</a>                                                                                                                                                                                                                   |
| Anti-goat Alexa-Fluor-568      | Invitrogen                | A-11057  | 5µg/ml                         | <a href="https://www.thermofisher.com/antibody/product/Donkey-anti-Goat-IgG-H-L-Cross-Adsorbed-Secondary-Antibody-Polyclonal/A-11057">https://www.thermofisher.com/antibody/product/Donkey-anti-Goat-IgG-H-L-Cross-Adsorbed-Secondary-Antibody-Polyclonal/A-11057</a>                                                                                                     |
| Anti-rabbit Alexa-Fluor-568    | Invitrogen                | A10042   | 5µg/ml                         | <a href="https://www.thermofisher.com/antibody/product/Donkey-anti-Rabbit-IgG-H-L-Highly-Cross-Adsorbed-Secondary-Antibody-Polyclonal/A10042">https://www.thermofisher.com/antibody/product/Donkey-anti-Rabbit-IgG-H-L-Highly-Cross-Adsorbed-Secondary-Antibody-Polyclonal/A10042</a>                                                                                     |
| Anti-rat Alexa-Fluor-488       | Invitrogen                | A-21208  | 5µg/ml                         | <a href="https://www.thermofisher.com/antibody/product/Donkey-anti-Rat-IgG-H-L-Highly-Cross-Adsorbed-Secondary-Antibody-Polyclonal/A-21208">https://www.thermofisher.com/antibody/product/Donkey-anti-Rat-IgG-H-L-Highly-Cross-Adsorbed-Secondary-Antibody-Polyclonal/A-21208</a>                                                                                         |
| Anti-mouse Alexa-Fluor-488     | Invitrogen                | A-21202  | 5µg/ml                         | <a href="https://www.thermofisher.com/antibody/product/Donkey-anti-Mouse-IgG-H-L-Highly-Cross-Adsorbed-Secondary-Antibody-Polyclonal/A-21202">https://www.thermofisher.com/antibody/product/Donkey-anti-Mouse-IgG-H-L-Highly-Cross-Adsorbed-Secondary-Antibody-Polyclonal/A-21202</a>                                                                                     |
| HRP conjugated anti-rat IgG    | Cell signaling technology | 7077     | 0.5 µg/ml (WB)                 | <a href="https://www.cellsignal.com/products/secondary-antibodies/anti-rat-igg-hrp-linked-antibody/7077">https://www.cellsignal.com/products/secondary-antibodies/anti-rat-igg-hrp-linked-antibody/7077</a>                                                                                                                                                               |
| HRP conjugated anti-rat IgG    | Abcam                     | ab97057  | 5 µg/ml (IF)                   | <a href="https://www.abcam.com/goat-rat-igg-hl-hrp-ab97057.html">https://www.abcam.com/goat-rat-igg-hl-hrp-ab97057.html</a>                                                                                                                                                                                                                                               |
| HRP conjugated anti-rabbit IgG | Cell signaling technology | 7074     | 0.5 µg/ml (WB)                 | <a href="https://www.cellsignal.com/products/secondary-antibodies/anti-rabbit-igg-hrp-linked-antibody/7074">https://www.cellsignal.com/products/secondary-antibodies/anti-rabbit-igg-hrp-linked-antibody/7074</a>                                                                                                                                                         |
| Dako EnVision+ Dual link       | Dako                      | K4061    | no dilution                    | <a href="https://www.agilent.com/en/product/immunohistochemistry/visualization-systems/envision-systems/envision-dual-link-single-reagents-(hrp-rabbit-mouse)-76787">https://www.agilent.com/en/product/immunohistochemistry/visualization-systems/envision-systems/envision-dual-link-single-reagents-(hrp-rabbit-mouse)-76787</a>                                       |

## Other

| Description                        | Source / Repository | Persistent ID / URL                                                                                                                                                             |
|------------------------------------|---------------------|---------------------------------------------------------------------------------------------------------------------------------------------------------------------------------|
| Western Lightning Plus ECL reagent | PerkinElmer         | <a href="https://www.perkinelmer.com/product/western-lightning-plus-ecl-680ml-nel105001ea">https://www.perkinelmer.com/product/western-lightning-plus-ecl-680ml-nel105001ea</a> |
| RNeasy Mini Kit                    | Qiagen              | <a href="https://www.qiagen.com/us/shop/pcr/rneasy-mini-kit/">https://www.qiagen.com/us/shop/pcr/rneasy-mini-kit/</a>                                                           |

|                                                 |            |                                                                                                                                                                                                                                               |
|-------------------------------------------------|------------|-----------------------------------------------------------------------------------------------------------------------------------------------------------------------------------------------------------------------------------------------|
| SuperScript III First-Strand Synthesis Supermix | Invitrogen | <a href="https://www.thermofisher.com/order/catalog/product/11752050#/11752050">https://www.thermofisher.com/order/catalog/product/11752050#/11752050</a>                                                                                     |
| iQ SYBR Green Supermix                          | Bio-Rad    | <a href="https://www.bio-rad.com/en-us/sku/1708880-iq-sybr-green-supermix-100-x-50-ul-rxns-2-5-ml-2-x-1-25-ml?ID=1708880">https://www.bio-rad.com/en-us/sku/1708880-iq-sybr-green-supermix-100-x-50-ul-rxns-2-5-ml-2-x-1-25-ml?ID=1708880</a> |

**Quantitative polymerase chain reaction primer sequences.**

| Primers | Forward                  | Reverse                |
|---------|--------------------------|------------------------|
| GAPDH   | AATGTGTCCGTCGTGGATCTGA   | AGTGTAGCCCAAGATGCCCTTC |
| CD3     | TCAGAAATGAAGTAATGAGCTGGC | CGTCACTGTCTAGAGGGCAC   |
| CD68    | TGTCTGATCTTGCTAGGACCG    | GAGAGTAACGGCCTTTTTGTGA |
